# Supplementary material for: Evaluation of Immunoreactivity and Protection Efficacy of Seneca Valley Virus Inactivated Vaccine in Finishing Pigs Based on Screening of Inactivated Agents and Adjuvants
Source: MDPI journal article supplement (doi:10.3390/vaccines10040631), 2022-04-18
Supplement: s1 [file s1]

## Supplementary Information for

### Evaluation of immunoreactivity and protection efficacy of Seneca Valley virus inactivated vaccine in finishing pigs based on screening of inactivated agents and adjuvants

Wenqiang Liu<sup>1,2</sup>, Xiangmin Li<sup>1,2,3,4</sup>, Huawei Zhang<sup>1,2</sup>, Genxi Hao<sup>1,2</sup>, Xianfei Shang<sup>1,2</sup>,

Huilan Wang<sup>1,2</sup>, Huanchun Chen<sup>1,2,3,4</sup> and Ping Qian<sup>1,2,3,4\*</sup>

Supplementary information includes 1 Figure.

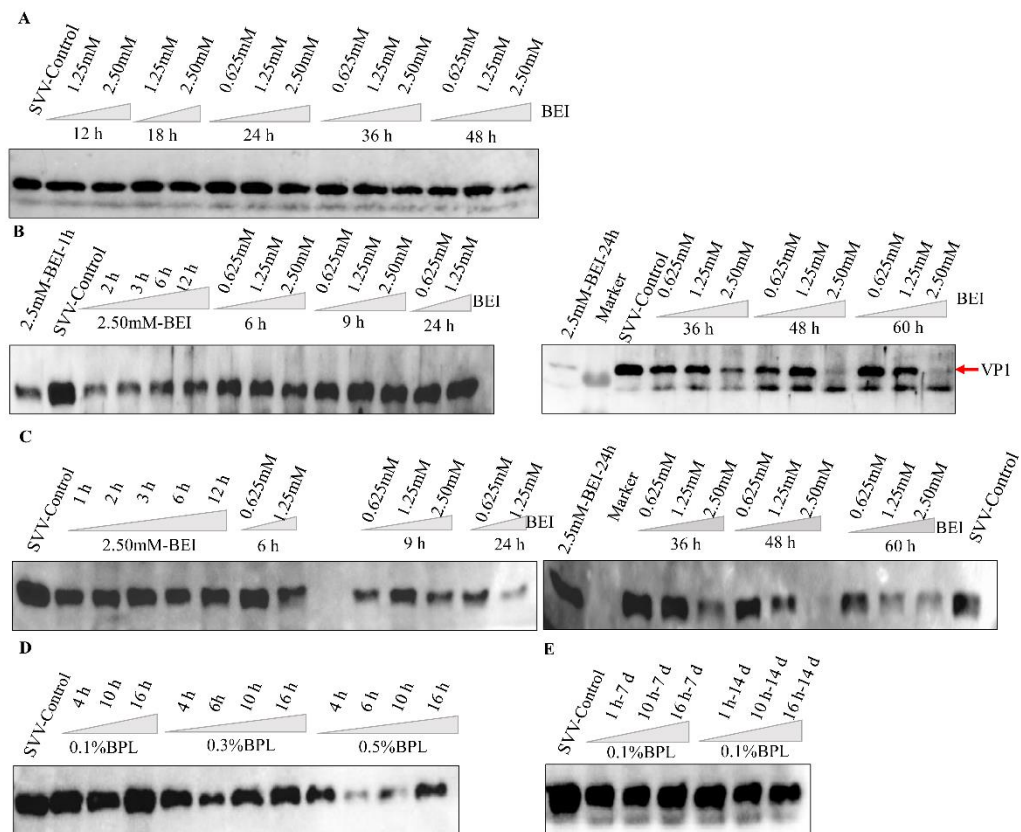

**Figure Supplement 1.** The content of antigen (VP1) detection of BEI and BPL inactivated samples. (A) Detection of VP1 content of different BEI concentrations in different hours post inactivation. (B) Detection of antigen VP1 of inactivated samples with different BEI concentrations stored at 4°C for 6-8 d. (C) Detection of VP1 content of inactivated samples with different BEI concentrations stored at 4°C for 13-15 d. (D) Detection of VP1 content of

inactivated samples with different BPL concentrations in different hours post inactivation. (E)

Detection of VP1 content of inactivated samples with different BEI concentrations stored at 4°C for 7 d,14

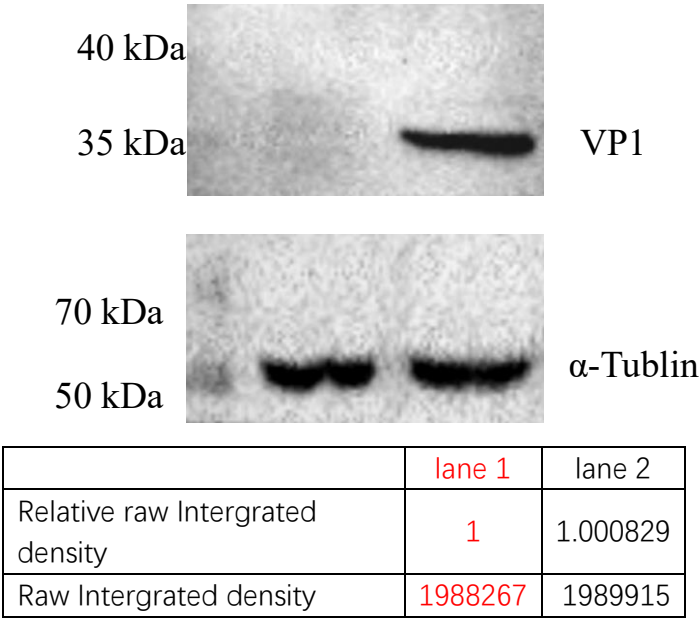

Figure S1. The blot (uncropped blots) showing all the bands with molecular weight markers of figure 1D is.

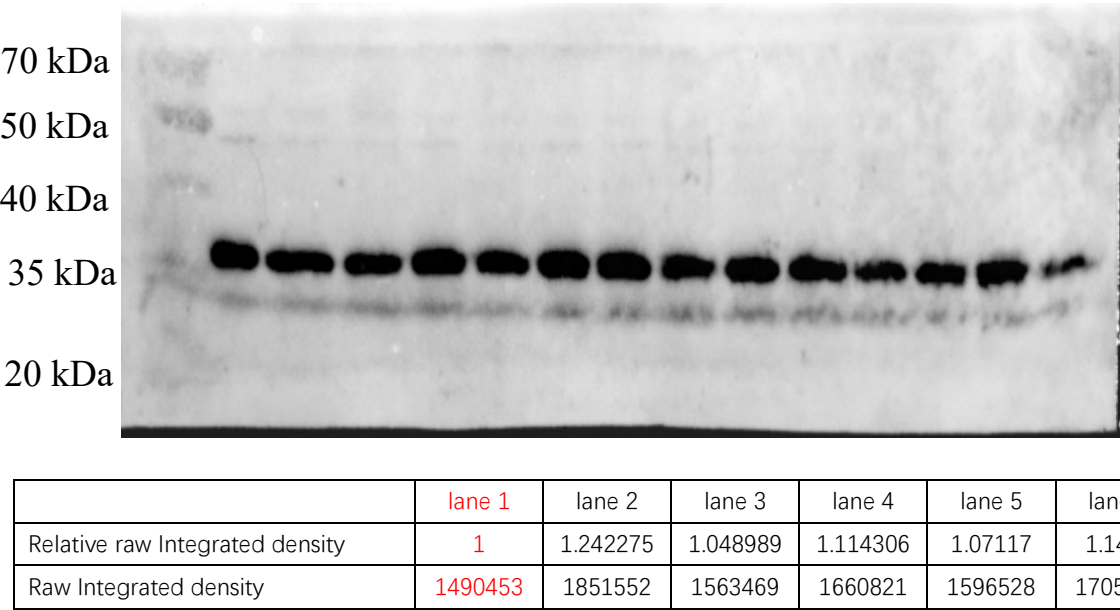

|                                 | lane 8   | lane 9   | lane 10 | lane 11  | lane 12  | lane 13  | lane 14 |
|---------------------------------|----------|----------|---------|----------|----------|----------|---------|
| Relative raw Integrated density | 0.990308 | 1.122923 | 1.1244  | 0.848949 | 0.961165 | 1.114616 | 0.61567 |
| Raw Integrated density          | 1476008  | 1673664  | 1675865 | 1265319  | 1432571  | 1661283  | 917627  |

Figure S2. The blot (uncropped blots) showing all the bands with all molecular weight markers of figure supplementary 1A is.

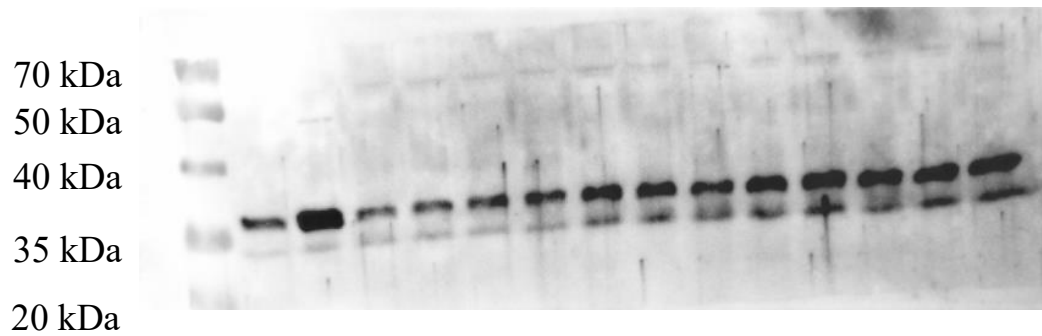

|                                 | lane 1   | lane 2 | lane 3  | lane 4   | lane 5   | lane 6   | lane 7   |
|---------------------------------|----------|--------|---------|----------|----------|----------|----------|
| Relative raw Integrated density | 0.469138 | 1      | 0.41144 | 0.448398 | 0.539594 | 0.654253 | 0.751427 |
| Raw Integrated density          | 64422    | 137320 | 56499   | 61574    | 74097    | 89842    | 103186   |

|                                 | lane 8   | lane 9   | lane 10  | lane 11  | lane 12 | lane 13  | lane 14  |
|---------------------------------|----------|----------|----------|----------|---------|----------|----------|
| Relative raw Integrated density | 0.745012 | 0.680629 | 0.724396 | 0.831998 | 0.85327 | 0.791924 | 0.932311 |
| Raw Integrated density          | 102305   | 93464    | 99474    | 114250   | 117171  | 108747   | 128025   |

Figure S3. The blot (uncropped blots) showing all the bands with all molecular weight markers of figure supplementary 1B (left) is.

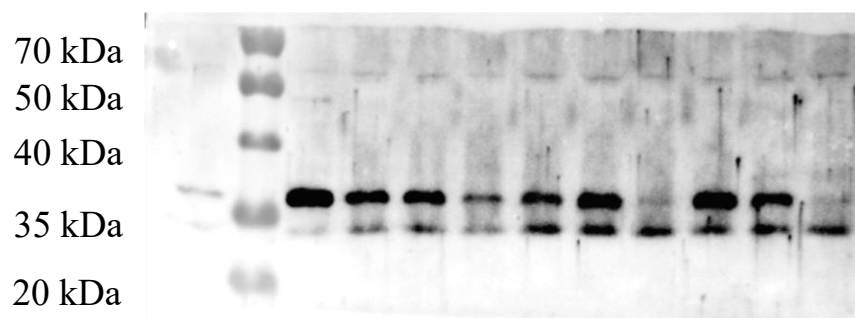

|                                 | lane 1   | lane 2 | lane 3   | lane 4   | lane 5   | lane 6   | lane 7   |
|---------------------------------|----------|--------|----------|----------|----------|----------|----------|
| Relative raw Integrated density | 0.055185 | 1      | 0.764696 | 0.732081 | 0.528303 | 0.751953 | 0.922281 |
| Raw Integrated density          | 7609     | 137881 | 105437   | 100940   | 72843    | 103680   | 127165   |

|                                 | lane 8   | lane 9   | lane 10  | lane 11  |
|---------------------------------|----------|----------|----------|----------|
| Relative raw Integrated density | 0.420725 | 0.983486 | 0.729687 | 0.358367 |

|                        |       |        |        |       |
|------------------------|-------|--------|--------|-------|
| Raw Integrated density | 58010 | 135604 | 100610 | 49412 |
|------------------------|-------|--------|--------|-------|

Figure S4. The blot (uncropped blots) showing all the bands with all molecular weight markers of figure supplementary 1B (right) is.

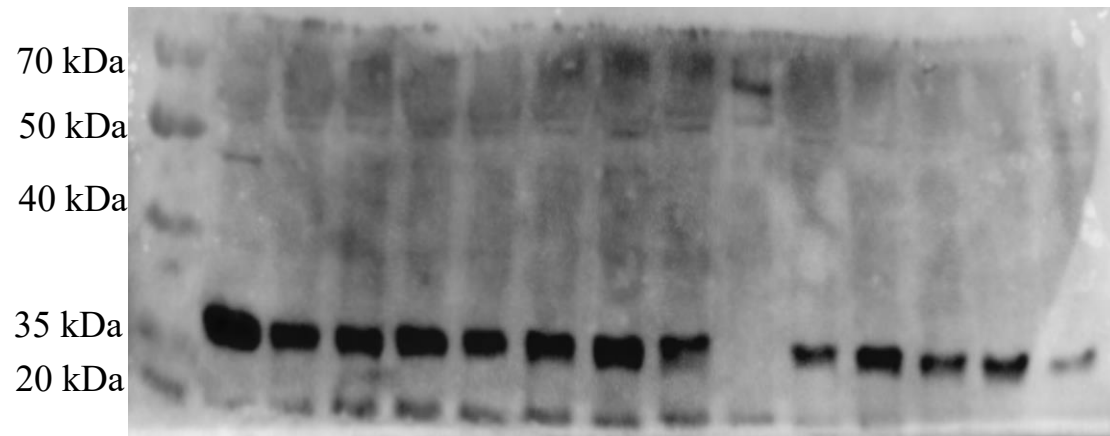

|                                  | lane 1  | lane 2  | lane 3   | lane 4   | lane 5   | lane 6   | lane 7   |
|----------------------------------|---------|---------|----------|----------|----------|----------|----------|
| Relative raw Intergrated density | 1       | 0.50236 | 0.425451 | 0.490043 | 0.373358 | 0.525437 | 0.641334 |
| Raw Intergrated density          | 1665259 | 836559  | 708486   | 816048   | 621738   | 874989   | 1067987  |

|                                  | lane 8   | lane 9   | lane 10  | lane 11 | lane 12  | lane13   |
|----------------------------------|----------|----------|----------|---------|----------|----------|
| Relative raw Intergrated density | 0.418821 | 0.273965 | 0.474393 | 0.27175 | 0.379766 | 0.298984 |
| Raw Intergrated density          | 697446   | 456222   | 789988   | 452534  | 632409   | 497886   |

Figure S5. The blot (uncropped blots) showing all the bands with all molecular weight markers of figure supplementary 1C (left) is.

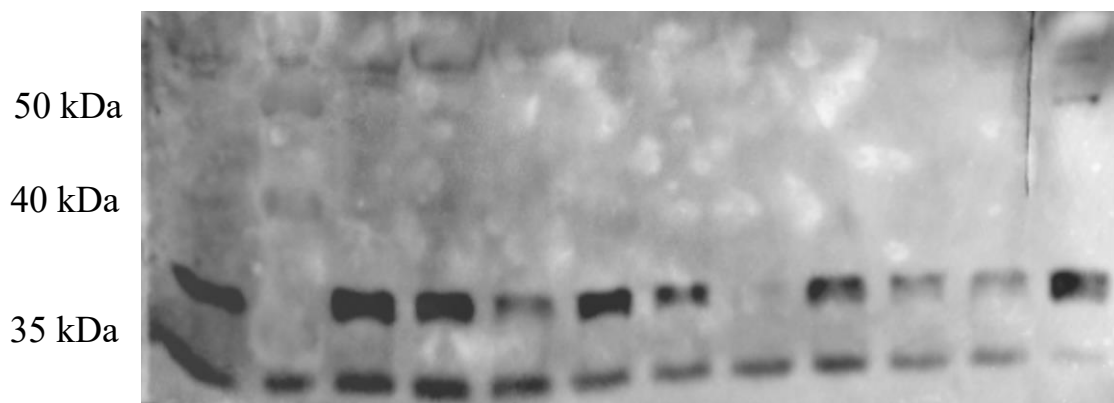

|                                 | lane 1   | lane 2   | lane 3   | lane 4   | lane 5   | lane 6   | lane 7   |
|---------------------------------|----------|----------|----------|----------|----------|----------|----------|
| Relative raw Integrated density | 0.469124 | 0.903839 | 0.941265 | 0.442334 | 0.767099 | 0.527696 | 0.661988 |
| Raw Integrated density          | 466993   | 899733   | 936989   | 440324   | 763614   | 525299   | 658981   |

|                                 | lane 8  | lane 9   | lane 10 |
|---------------------------------|---------|----------|---------|
| Relative raw Integrated density | 0.25625 | 0.257835 | 1       |
| Raw Integrated density          | 255086  | 256664   | 995457  |

Figure S6. The blot (uncropped blots) showing all the bands with all molecular weight markers of figure supplementary 1C (right) is.

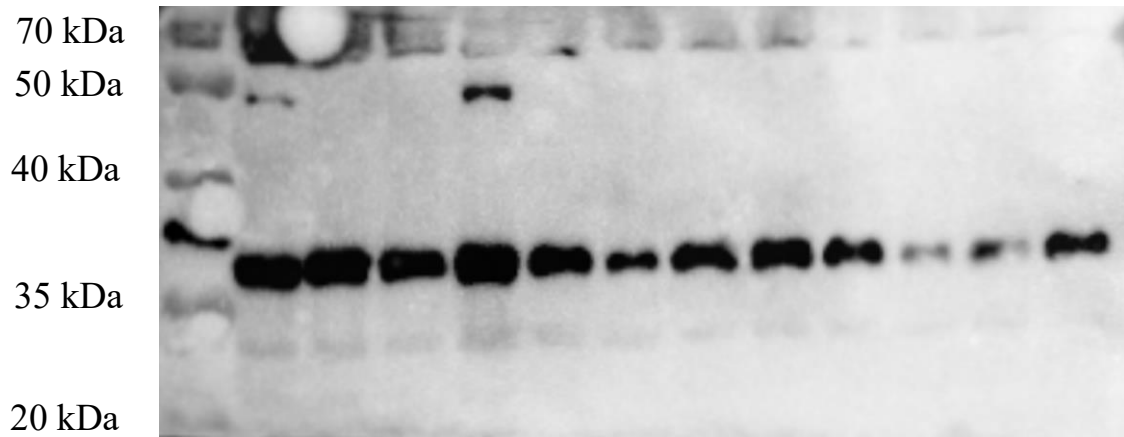

|                                 | lane 1  | lane 2   | lane 3   | lane 4  | lane 5  | lane 6   | lane 7   |
|---------------------------------|---------|----------|----------|---------|---------|----------|----------|
| Relative raw Integrated density | 1       | 1.009553 | 0.846337 | 1.02203 | 0.77181 | 0.405494 | 0.646221 |
| Raw Integrated density          | 4401438 | 4443483  | 3725102  | 4498401 | 3397072 | 1784757  | 2844302  |

|                                 | lane 8   | lane 9   | lane 10  | lane 11  | lane 12  |
|---------------------------------|----------|----------|----------|----------|----------|
| Relative raw Integrated density | 0.656142 | 0.460216 | 0.073925 | 0.206977 | 0.458465 |
| Raw Integrated density          | 2887970  | 2025612  | 325375   | 910996   | 2017906  |

Figure S7. The blot (uncropped blots) showing all the bands with all molecular weight markers of figure supplementary 1D is.

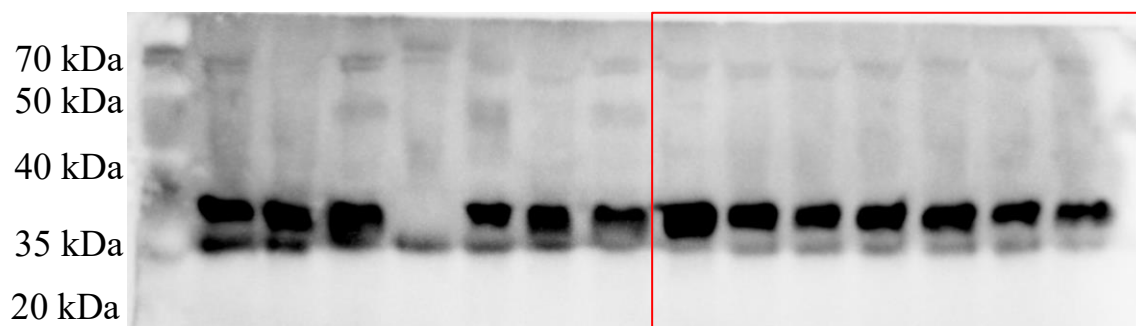

|                                 | lane 1  | lane 2   | lane 3   | lane 4   | lane 5   | lane 6  | lane 7   |
|---------------------------------|---------|----------|----------|----------|----------|---------|----------|
| Relative raw Integrated density | 1       | 0.731011 | 0.602422 | 0.695434 | 0.754378 | 0.57405 | 0.514068 |
| Raw Integrated density          | 3654865 | 2671746  | 2201770  | 2541718  | 2757151  | 2098074 | 1878848  |

Figure S8. The blot (uncropped blots) showing all the bands with all molecular weight

markers of figure supplementary 1E is.

Table S1. log10 SVV genome copies/ml total RNA read in Figure 4C is

| Days post challenge | log10 SVV genome copies/ml                           |               |               |
|---------------------|------------------------------------------------------|---------------|---------------|
|                     | Group                                                |               |               |
|                     | Control                                              | BPL-201       | BPL-1313      |
| 2d                  | 5.023298;7.077215;<br>7.062168;7.129689;<br>7.14379  | 0; 0; 0; 0; 0 | 0; 0; 0; 0; 0 |
| 4d                  | 4.600745;6.540895;<br>6.658265;6.86633;<br>6.83127   | 0; 0; 0; 0; 0 | 0; 0; 0; 0; 0 |
| 6d                  | 4.149201;6.241659;<br>7.155992;7.068536<br>6.704075  | 0; 0; 0; 0; 0 | 0; 0; 0; 0; 0 |
| 8d                  | 3.544638; 6.807146<br>7.130786; 6.167643<br>5.994349 | 0; 0; 0; 0; 0 | 0; 0; 0; 0; 0 |
| 10d                 | 2.412735;4.604300<br>4.502354<br>4.518465            | 0; 0; 0; 0; 0 | 0; 0; 0; 0; 0 |
| 12d                 | 2.94780; 3.4981600<br>2.955026;3.021415              | 0; 0; 0; 0; 0 | 0; 0; 0; 0; 0 |
| 14d                 | 1.903245; 3.2783<br>1.923475; 2.976532               | 0; 0; 0; 0; 0 | 0; 0; 0; 0; 0 |
